# Supplementary material for: Recombinase polymerase amplification (RPA) with lateral flow detection for three Anaplasma species of importance to livestock health
Source: PubMed Central journal article supplement (PMC8342517; doi:10.1038/s41598-021-95402-y), 2021-08-05
Supplement: 41598_2021_95402_MOESM2_ESM.pdf [file 41598_2021_95402_MOESM2_ESM.pdf]

# Supplemental Figure 1

**A**

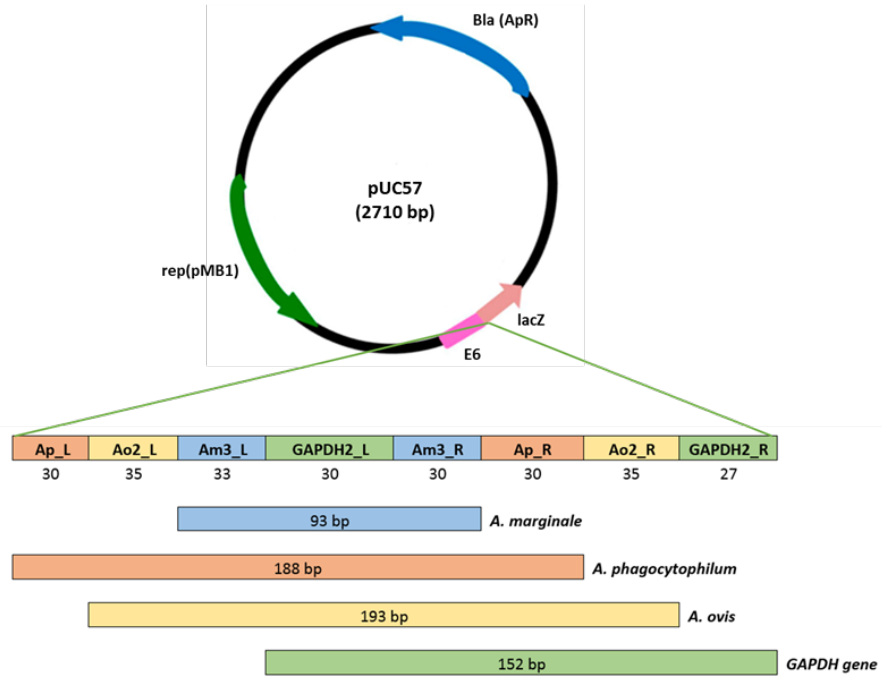

**B**

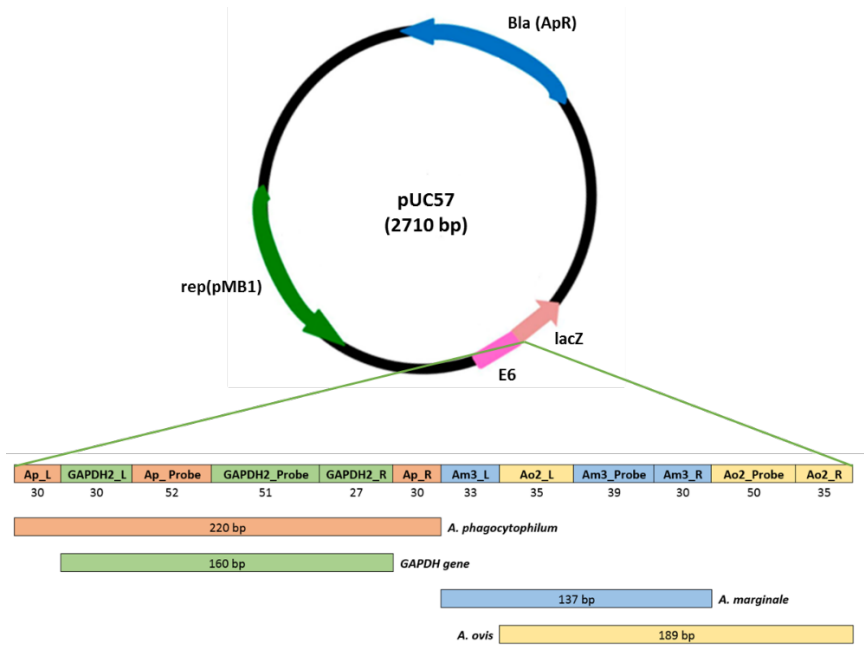

Supplemental Figure 2

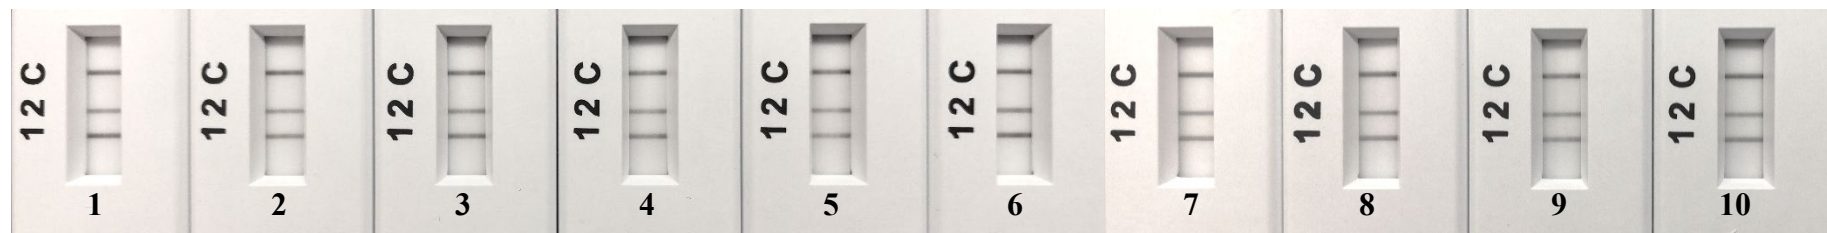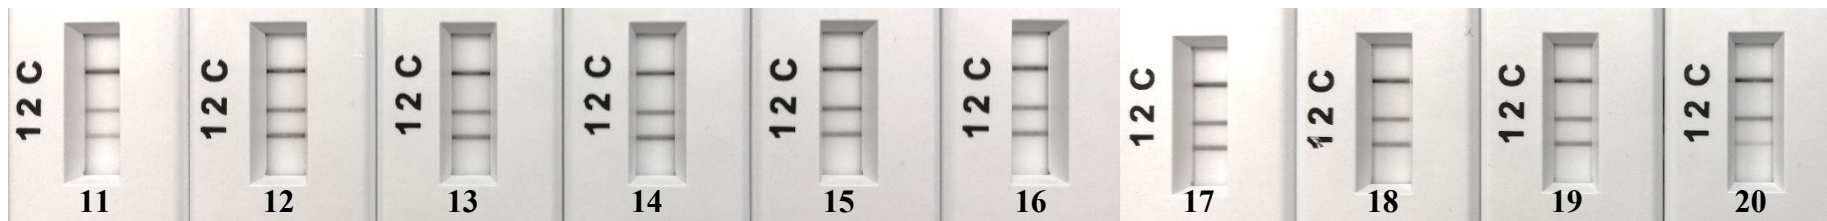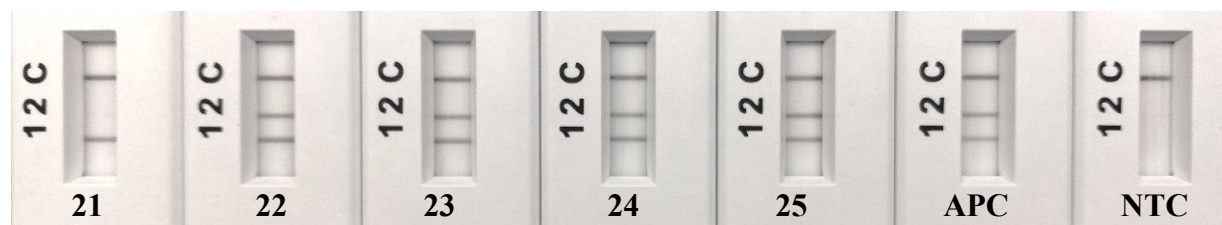

**Supplemental Figure 3**

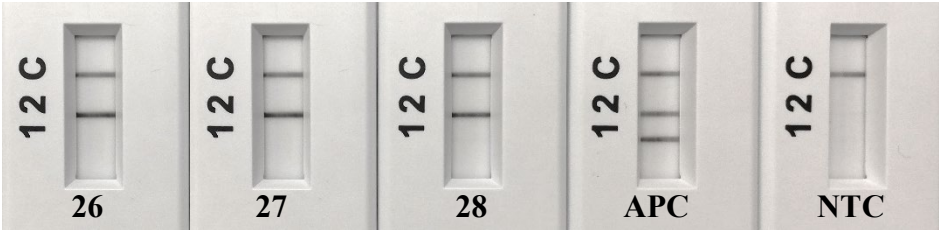

**Supplemental Table 1.** Endpoint PCR and multiplex lateral flow RPA detection of *A. marginale* from cELISA-positive serum samples provided by Oklahoma State University College of Veterinary Medicine, Stillwater.

| Serum Samples | <i>A. marginale</i><br>PCR | Multiplex RPA- <i>nfo</i>    |                                 |
|---------------|----------------------------|------------------------------|---------------------------------|
|               |                            | Internal control<br>(Line 1) | <i>A. marginale</i><br>(Line 2) |
| 1             | -                          | +                            | -                               |
| 2             | -                          | +                            | -                               |
| 3             | -                          | +                            | -                               |
| 4             | -                          | +                            | +                               |
| 5             | -                          | +                            | -                               |
| 6             | -                          | +                            | +                               |
| 7             | -                          | +                            | +                               |
| 8             | -                          | +                            | +                               |
| 9             | -                          | +                            | +                               |
| 10            | -                          | +                            | +                               |
| 11            | -                          | +                            | +                               |
| 12            | -                          | +                            | +                               |
| 13            | -                          | +                            | +                               |
| 14            | -                          | +                            | +                               |
| 15            | -                          | +                            | +                               |
| 16            | +                          | +                            | +                               |
| 17            | -                          | +                            | +                               |
| 18            | -                          | +                            | +                               |
| 19            | -                          | +                            | +                               |
| 20            | -                          | +                            | +                               |
| 21            | -                          | +                            | +                               |
| 22            | -                          | +                            | +                               |
| 23            | -                          | +                            | +                               |
| 24            | -                          | +                            | +                               |
| APC           | NT                         | +                            | +                               |
| Am sample     | +                          | +                            | +                               |
| NTC           | -                          | -                            | -                               |

**Supplemental Table 2.** Results from Quantitative PCR using optimized RPA primers and multiplex RPA-*nfo* detection of varying prevalence rates of *A. marginale* strains in bovine blood samples and *A. phagocytophilum* from different cell culture samples provided by Oklahoma State University College of Veterinary Medicine, Stillwater.

| N°                                | Cow # /<br>cell line | Sample<br>date /<br>isolate | Blood<br>prevalence | RPA Results    |                       | qPCR (RPA<br>primers)<br>(pg/ $\mu$ l) |
|-----------------------------------|----------------------|-----------------------------|---------------------|----------------|-----------------------|----------------------------------------|
|                                   |                      |                             |                     | Line 1<br>(IC) | Line 2<br>(Anaplasma) |                                        |
| <i>A. marginale</i>               |                      |                             |                     |                |                       |                                        |
| 1                                 | PA407                | 06/01                       | 16                  | +              | +                     | 5.36                                   |
| 2                                 |                      | 08/17                       | 0.4                 | +              | +                     | 0.13                                   |
| 3                                 |                      | 12/14                       | 2                   | +              | +                     | 0.59                                   |
| 4                                 |                      | 02/12                       | 0                   | +              | +                     | 15.73                                  |
| 5                                 | PA412                | 04/05                       | 21                  | +              | +                     | 12.44                                  |
| 6                                 |                      | 05/27                       | 2                   | +              | +                     | 2.26                                   |
| 7                                 | PA415                | 04/20                       | 57                  | +              | +                     | 13.6                                   |
| 8                                 | PA417                | 05/26                       | 32                  | +              | +                     | 16.42                                  |
| 9                                 |                      | 07/06                       | 2                   | +              | +                     | 0.82                                   |
| 10                                |                      | 07/30                       | 1                   | +              | +                     | 0.0863                                 |
| 11                                |                      | 09/27                       | 0.5                 | +              | +                     | 0.0643                                 |
| 12                                |                      | 09/09                       | 9                   | +              | +                     | 0.357                                  |
| 13                                | PA418                | 05/11                       | 43                  | +              | +                     | 0.546                                  |
| 14                                |                      | 07/02                       | 3                   | +              | +                     | 0.128                                  |
| 15                                |                      | 07/19                       | 2                   | +              | +                     | 0.0837                                 |
| <i>Other A. marginale strains</i> |                      |                             |                     |                |                       |                                        |
| 16                                | PA414                | OK                          | 44                  | +              | +                     | 5.533                                  |
| 17                                | PA349                | Da*                         | 50                  | +              | +                     | 4.43                                   |
| 18                                | PA413                | OK                          | 8                   | +              | +                     | 5.54                                   |
| 19                                | PA420                | OK                          | 12                  | +              | +                     | 9.47                                   |
| 20                                | PA428                | OK                          | 9                   | +              | +                     | 0.231                                  |
| 21                                | PA430                | OK                          | 7                   | +              | -                     | 0                                      |
| 22                                | PA443                | OK                          | 20                  | +              | +                     | 1.208                                  |
| 23                                | PA481                | VA                          | 35                  | +              | +                     | 13.97                                  |
| 24                                | PA482                | OK                          | 9                   | +              | +                     | 11.942                                 |
| 25                                | PA499                | OK                          | 8                   | +              | +                     | 3.748                                  |
| <i>A. phagocytophilum</i>         |                      |                             |                     |                |                       |                                        |
| 26                                | HL-60                |                             | cell culture        | -              | +                     | 79.35                                  |
| 27                                | Ap74                 |                             | cell culture        | -              | +                     | 28.91                                  |
| 28                                | ISE6                 |                             | cell culture        | -              | +                     | 24.45                                  |

\*Da = derived from *Dermacentor albipictus* ticks
